# Supplementary material for: Sodium trithiocarbonate cathode for high-performance sodium–sulfur batteries
Source: Royal Society of Chemistry journal article supplement (doi:10.1039/d2ta07918f), 2022-11-25
Supplement: d2ta07918f1.pdf [file d2ta07918f1.pdf]

## Supporting Information

### **Sodium Trithiocarbonate Cathode for High-performance Sodium-sulfur Batteries**

Hyunki Sul, Amruth Bhargav, and Arumugam Manthiram\*

*Walker Department of Mechanical Engineering, The University of Texas at Austin, Austin, Texas  
78712, United States*

\*Email: [manth@austin.utexas.edu](mailto:manth@austin.utexas.edu)

**(a) Commercial  $\text{Na}_2\text{S}$  powder**

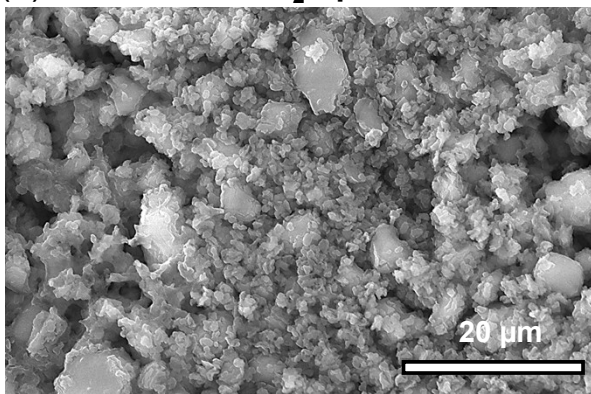

**(b) Synthesized  $\text{Na}_2\text{CS}_3$  powder**

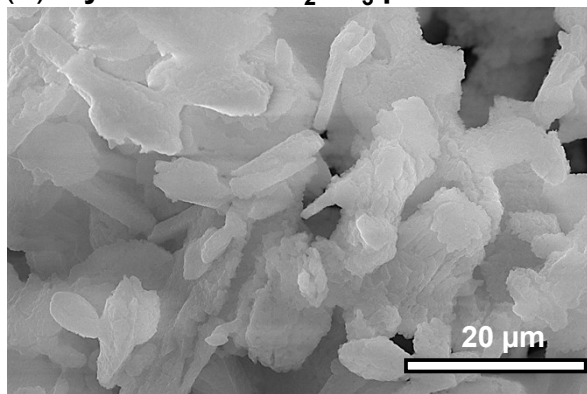

**Figure S1.** SEM images of (a) commercial  $\text{Na}_2\text{S}$  powder and (b) synthesized  $\text{Na}_2\text{CS}_3$  powder.

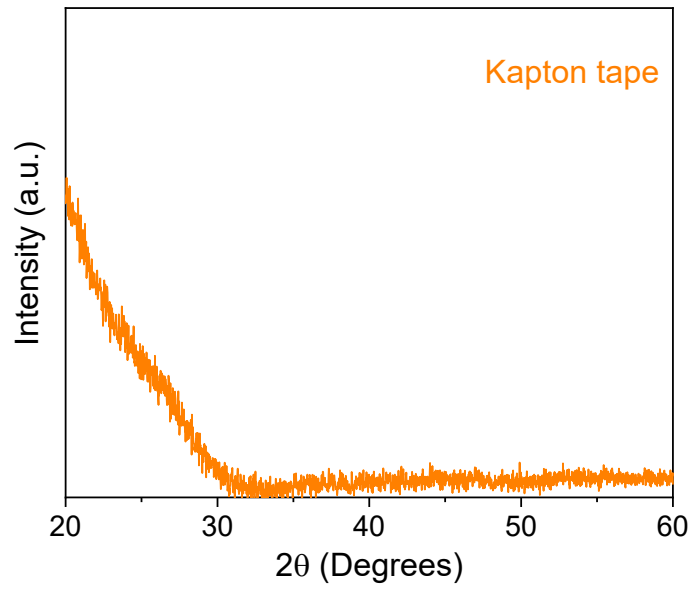

**Figure S2.** XRD patterns of Kapton tape only.

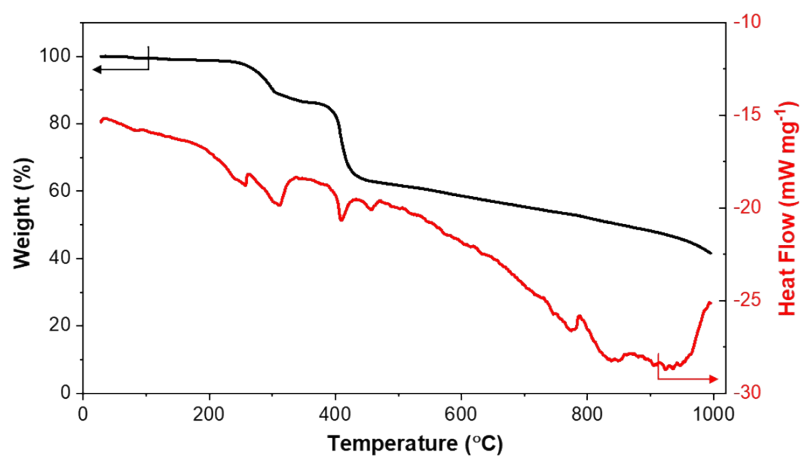

**Figure S3.** TGA and DSC curves of  $\text{Na}_2\text{CS}_3$  in Ar atmosphere.  $\text{Na}_2\text{CS}_3$  undergoes a three-step thermal decomposition at 250 - 300 °C, 390 - 420 °C, and > 420°C.

**Na<sub>2</sub>CS<sub>3</sub> cathode Charged to 2.2 V**

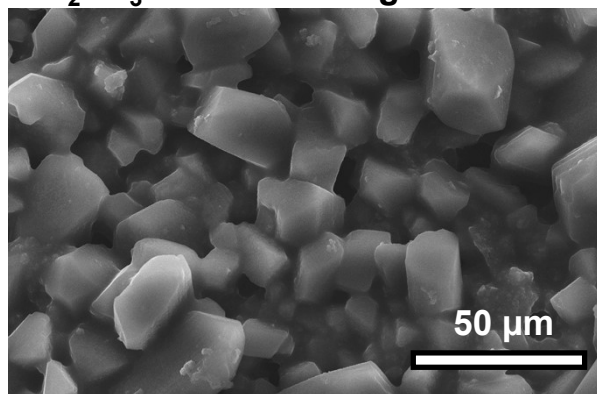

**Charged to 2.6 V**

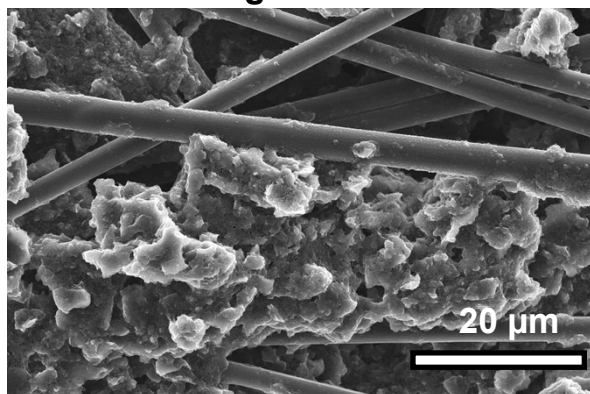

**Charged to 2.4 V**

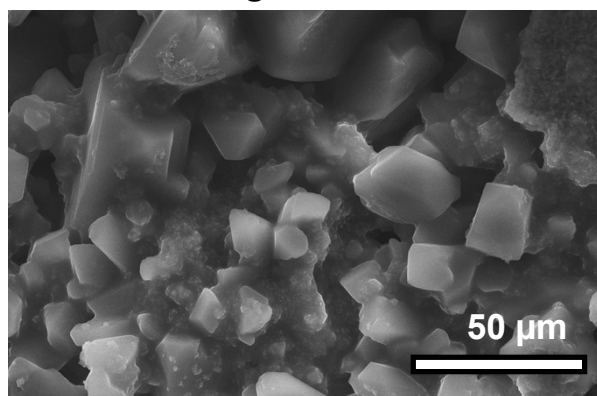

**Charged to 2.8 V**

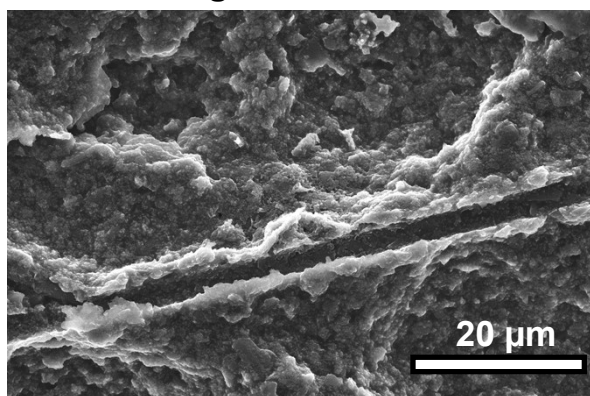

**Figure S4.** SEM images of Na<sub>2</sub>CS<sub>3</sub> cathode at different charge states (2.2, 2.4, 2.6, and 2.8 V).

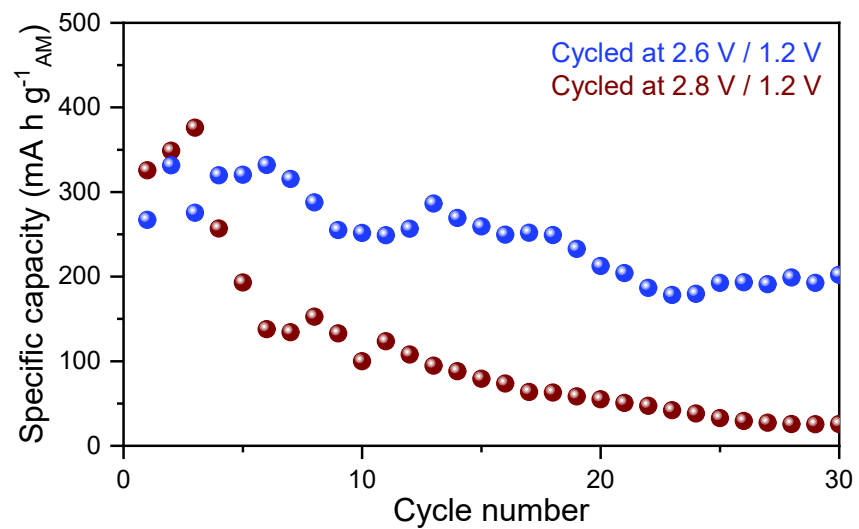

**Figure S5.** Cycling stability comparison of the Na || Na<sub>2</sub>CS<sub>3</sub> cells when cycled at 2.6 – 1.2 V (blue) and 2.8 – 1.2 V (brown). The active material loading is 1.5 mg cm<sup>-2</sup> and the electrolyte to active material loading is 25 μL mg<sup>-1</sup>.

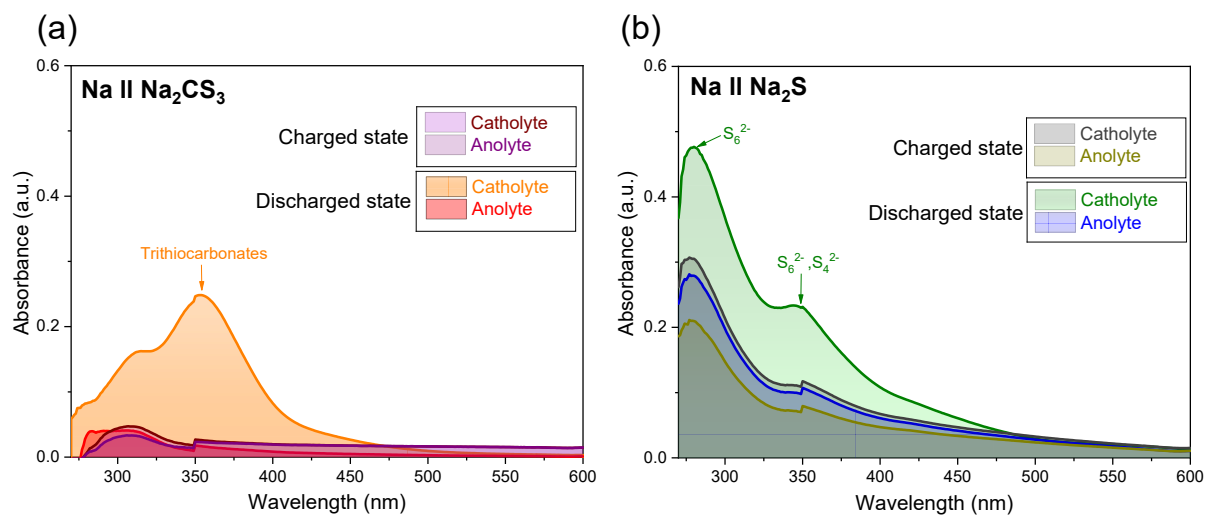

**Figure S6.** UV-Vis spectra of the catholytes and anolytes from the optical H-cell at charged and discharged states. The optical cell was initially charged and subsequently discharged: (a) Na || Na<sub>2</sub>CS<sub>3</sub> and (b) Na || Na<sub>2</sub>S cells.

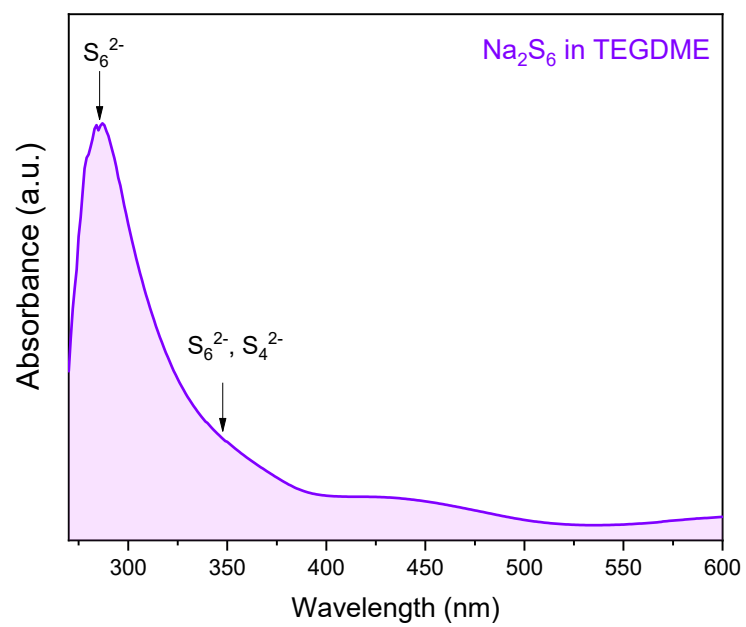

**Figure S7.** UV-Vis spectra of  $\text{Na}_2\text{S}_6$  in TEGDME.



## 20 cycled Na-metal anode surface

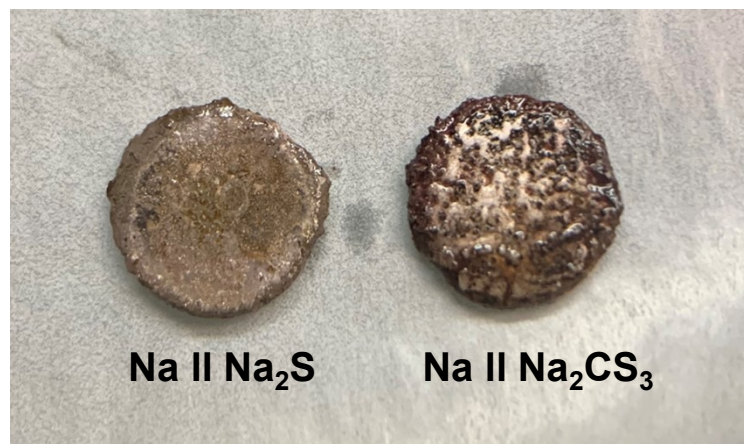

**Figure S8.** Optical photograph of Na-metal anodes after 20 cycles from the Na || Na<sub>2</sub>S (left) and Na || Na<sub>2</sub>CS<sub>3</sub> (right) cells.

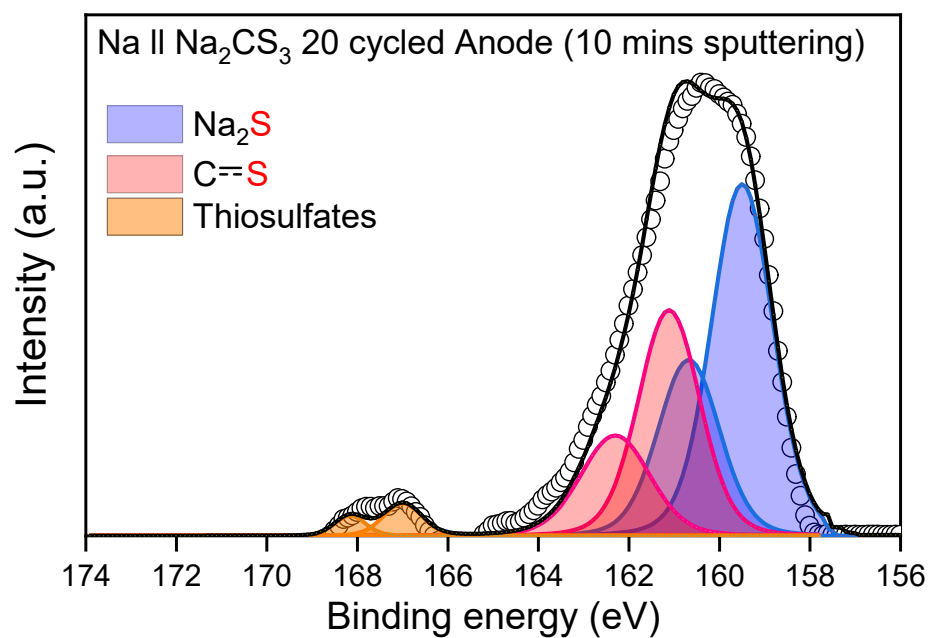

**Figure S9.** S 2p XPS data of the 20 cycled Na-metal anode of the Na || Na<sub>2</sub>CS<sub>3</sub> cell after 10 mins of Ar<sup>+</sup> sputtering.

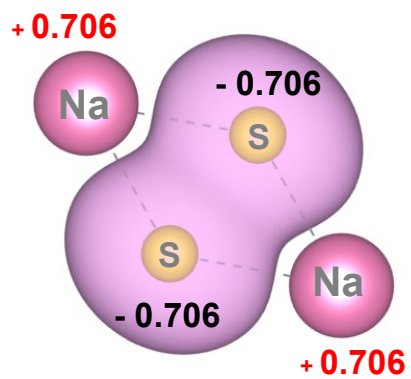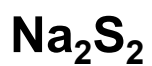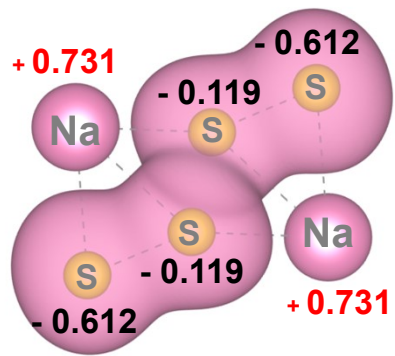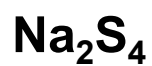

**Figure S10.** Bader charge analysis of  $\text{Na}_2\text{S}_2$  and  $\text{Na}_2\text{S}_4$ .
